# Supplementary material for: Regional beryllium-10 production rate for the mid-elevation mountainous regions in central Europe, deduced from a multi-method study of moraines and lake sediments in the Black Forest
Source: Copernicus journal article supplement (doi:10.5194/gchron-6-147-2024), 2024-05-17
Supplement: Supplementary file 1 [file gchron-6-147-2024-supplement.pdf]

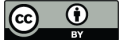

*Supplement of*

**Regional beryllium-10 production rate for the mid-elevation mountainous regions in central Europe, deduced from a multi-method study of moraines and lake sediments in the Black Forest**

**Felix Martin Hofmann et al.**

*Correspondence to:* Felix Martin Hofmann ([felix.martin.hofmann@geologie.uni-freiburg.de](mailto:felix.martin.hofmann@geologie.uni-freiburg.de))

The copyright of individual parts of the supplement might differ from the article licence.

## Detailed sample documentation

### FS-01a

**Table S1.** Location and dimensions of the FS-01a boulder, characteristics of the sampling surface, sample thickness, and topographic shielding factors derived from field data and with the ArcGIS toolbox of Li (2018).

|                                                       |                                                                                                               |          |
|-------------------------------------------------------|---------------------------------------------------------------------------------------------------------------|----------|
| <b>Coordinates (WGS 1984 coordinate system)</b>       | 47.872193 °N 8.033919 °E                                                                                      |          |
| <b>Elevation (m above sea-level)</b>                  | 1128                                                                                                          |          |
| <b>Context</b>                                        | Boulder on the distal side of the ice-marginal moraine at position FS-01 of the former Feldsee cirque glacier |          |
| <b>Lithology</b>                                      | Gneiss                                                                                                        |          |
| <b>Dimensions: length, width, and height (m)</b>      | 3.20 × 2.20 × 1.60                                                                                            |          |
| <b>Strike/dip of the sampled surface (°)</b>          | 210/10                                                                                                        |          |
| <b>Height above ground of the sampled surface (m)</b> | 1.50                                                                                                          |          |
| <b>Sample thickness (cm)</b>                          | 1.5                                                                                                           |          |
| <b>Topographic shielding factor</b>                   | <b>Field-data-based (Balco, 2018)</b>                                                                         | 0.941791 |
|                                                       | <b>Digital-elevation-model-based (Li, 2018)</b>                                                               | 0.958616 |

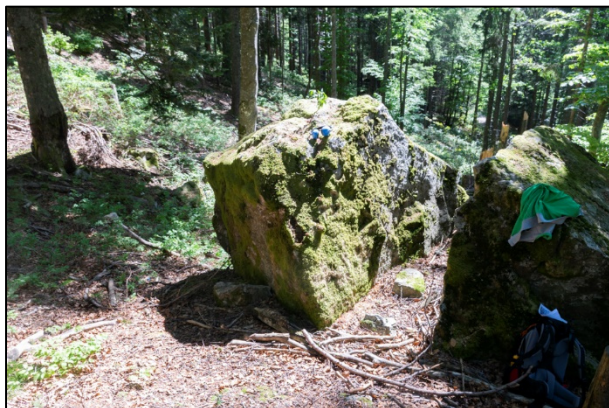

**Figure S1.** Photo of the FS-01a boulder.

## FS-02a

**Table S2.** Location and dimensions of the FS-02a boulder, characteristics of the sampling surface, sample thickness, and topographic shielding factors derived from field data and with the ArcGIS toolbox of Li (2018).

|                                                       |                                                                                                         |          |
|-------------------------------------------------------|---------------------------------------------------------------------------------------------------------|----------|
| <b>Coordinates (WGS 1984 coordinate system)</b>       | 47.872164 °N 8.035611 °E                                                                                |          |
| <b>Elevation (m above sea-level)</b>                  | 1113                                                                                                    |          |
| <b>Context</b>                                        | Boulder on the crest of the ice-marginal moraine at position FS-02 of the former Feldsee cirque glacier |          |
| <b>Lithology</b>                                      | Gneiss                                                                                                  |          |
| <b>Dimensions: length, width, and height (m)</b>      | 2.80 × 2.60 × 1.10                                                                                      |          |
| <b>Strike/dip of the sampled surface (°)</b>          | 160/30                                                                                                  |          |
| <b>Height above ground of the sampled surface (m)</b> | 1.05                                                                                                    |          |
| <b>Sample thickness (cm)</b>                          | 2.4                                                                                                     |          |
| <b>Topographic shielding factor</b>                   | <b>Field-data-based (Balco, 2018)</b>                                                                   | 0.932007 |
|                                                       | <b>Digital-elevation-model-based (Li, 2018)</b>                                                         | 0.947912 |

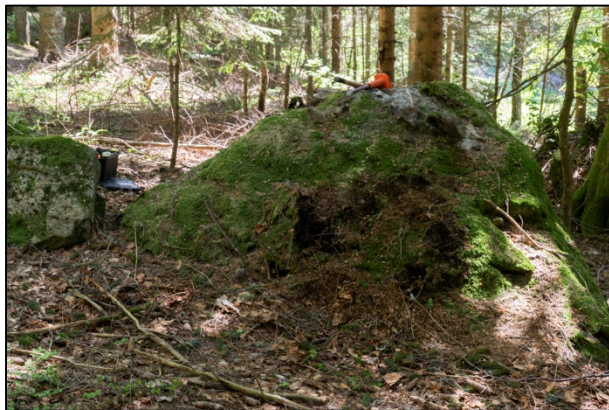

**Figure S2.** Photo of the FS-02a boulder.

## FS-02b

**Table S3.** Location and dimensions of the FS-02b boulder, characteristics of the sampling surface, sample thickness, and topographic shielding factors derived from field data and with the ArcGIS toolbox of Li (2018).

|                                                       |                                                 |                                                                                                         |
|-------------------------------------------------------|-------------------------------------------------|---------------------------------------------------------------------------------------------------------|
| <b>Coordinates (WGS 1984 coordinate system)</b>       |                                                 | 47.871428 °N 8.037746 °E                                                                                |
| <b>Elevation (m above sea-level)</b>                  |                                                 | 1103                                                                                                    |
| <b>Context</b>                                        |                                                 | Boulder on the crest of the ice-marginal moraine at position FS-02 of the former Feldsee cirque glacier |
| <b>Lithology</b>                                      |                                                 | Gneiss                                                                                                  |
| <b>Dimensions: length, width, and height (m)</b>      |                                                 | 2.20 × 1.70 × 0.90                                                                                      |
| <b>Strike/dip of the sampled surface (°)</b>          |                                                 | 190/10                                                                                                  |
| <b>Height above ground of the sampled surface (m)</b> |                                                 | 0.85                                                                                                    |
| <b>Sample thickness (cm)</b>                          |                                                 | 2.6                                                                                                     |
| <b>Topographic shielding factor</b>                   | <b>Field-data-based (Balco, 2018)</b>           | 0.982220                                                                                                |
|                                                       | <b>Digital-elevation-model-based (Li, 2018)</b> | 0.987496                                                                                                |

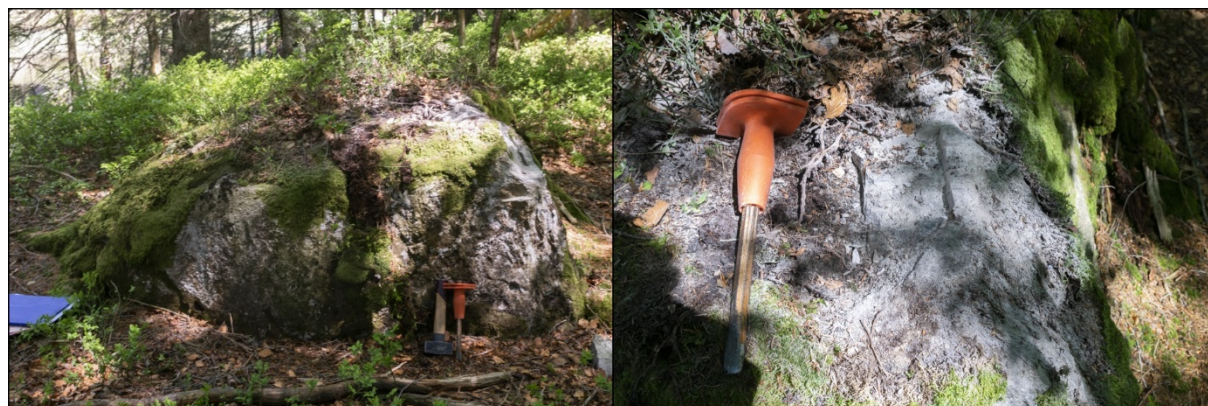

**Figure S3.** Photo of the FS-02b boulder and the sampling surface.

## FS-02c

**Table S4.** Location and dimensions of the FS-02c boulder, characteristics of the sampling surface, sample thickness, and topographic shielding factors derived from field data and with the ArcGIS toolbox of Li (2018).

|                                                       |                                                                                                         |          |
|-------------------------------------------------------|---------------------------------------------------------------------------------------------------------|----------|
| <b>Coordinates (WGS 1984 coordinate system)</b>       | 47.869931 °N 8.036674 °E                                                                                |          |
| <b>Elevation (m above sea-level)</b>                  | 1108                                                                                                    |          |
| <b>Context</b>                                        | Boulder on the crest of the ice-marginal moraine at position FS-02 of the former Feldsee cirque glacier |          |
| <b>Lithology</b>                                      | Gneiss                                                                                                  |          |
| <b>Dimensions: length, width, and height (m)</b>      | 3.10 × 2.90 × 1.40                                                                                      |          |
| <b>Strike/dip of the sampled surface (°)</b>          | 100/5                                                                                                   |          |
| <b>Height above ground of the sampled surface (m)</b> | 1.40                                                                                                    |          |
| <b>Sample thickness (cm)</b>                          | 2.0                                                                                                     |          |
| <b>Topographic shielding factor</b>                   | <b>Field-data-based (Balco, 2018)</b>                                                                   | 0.984843 |
|                                                       | <b>Digital-elevation-model-based (Li, 2018)</b>                                                         | 0.987583 |

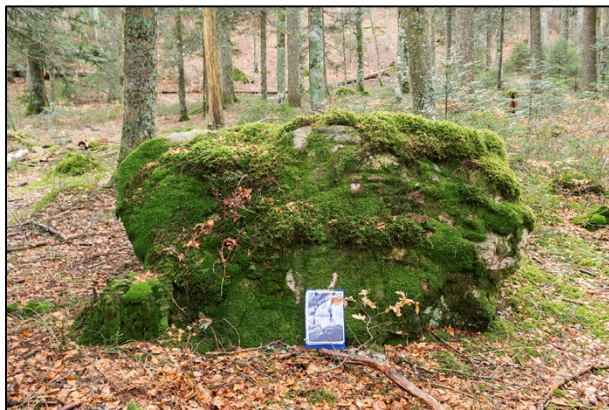

**Figure S4.** Photo of the FS-02c boulder. The clipboard has a height of 0.3 m.



## FS-02d

**Table S5.** Location and dimensions of the FS-02d boulder, characteristics of the sampling surface, sample thickness, and topographic shielding factors derived from field data and with the ArcGIS toolbox of Li (2018).

|                                                       |                                                                                                         |          |
|-------------------------------------------------------|---------------------------------------------------------------------------------------------------------|----------|
| <b>Coordinates (WGS 1984 coordinate system)</b>       | 47.870075 °N 8.037022 °E                                                                                |          |
| <b>Elevation (m above sea-level)</b>                  | 1107                                                                                                    |          |
| <b>Context</b>                                        | Boulder on the crest of the ice-marginal moraine at position FS-02 of the former Feldsee cirque glacier |          |
| <b>Lithology</b>                                      | Gneiss                                                                                                  |          |
| <b>Dimensions: length, width, and height (m)</b>      | 2.50 × 2.30 × 1.80                                                                                      |          |
| <b>Strike/dip of the sampled surface (°)</b>          | 20/15                                                                                                   |          |
| <b>Height above ground of the sampled surface (m)</b> | 1.65                                                                                                    |          |
| <b>Sample thickness (cm)</b>                          | 1.9                                                                                                     |          |
| <b>Topographic shielding factor</b>                   | <b>Field-data-based (Balco, 2018)</b>                                                                   | 0.986562 |
|                                                       | <b>Digital-elevation-model-based (Li, 2018)</b>                                                         | 0.988521 |

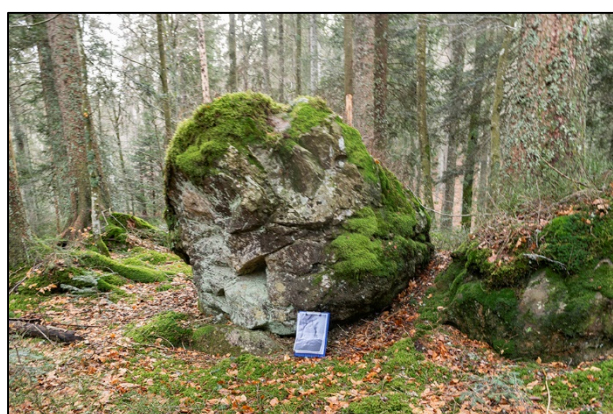

**Figure S5.** Photo of the FS-02c boulder. The clipboard has a height of 0.3 m.

## FS-03a

**Table S6.** Location and dimensions of the FS-03a boulder, characteristics of the sampling surface, sample thickness, and topographic shielding factors derived from field data and with the ArcGIS toolbox of Li (2018).

|                                                |                                          |                                                                                                               |
|------------------------------------------------|------------------------------------------|---------------------------------------------------------------------------------------------------------------|
| Coordinates (WGS 1984 coordinate system)       |                                          | 47.869613 °N 8.037770 °E                                                                                      |
| Elevation (m above sea-level)                  |                                          | 1108                                                                                                          |
| Context                                        |                                          | Boulder on the distal side of the ice-marginal moraine at position FS-03 of the former Feldsee cirque glacier |
| Lithology                                      |                                          | Gneiss                                                                                                        |
| Dimensions: length, width, and height (m)      |                                          | 3.20 × 2.00 × 2.20                                                                                            |
| Strike/dip of the sampled surface (°)          |                                          | 0/0                                                                                                           |
| Height above ground of the sampled surface (m) |                                          | 1.40                                                                                                          |
| Sample thickness (cm)                          |                                          | 2.1                                                                                                           |
| Topographic shielding factor                   | Field-data-based (Balco, 2018)           | Not determined, as the boulder was located in a dense mixed forest                                            |
|                                                | Digital-elevation-model-based (Li, 2018) | 0.989194                                                                                                      |

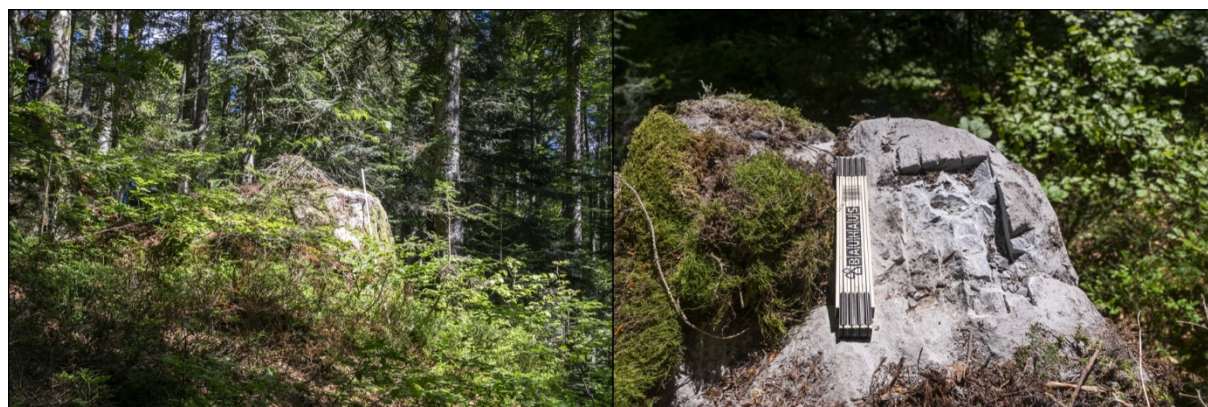

**Figure S6.** Photo of the FS-03a boulder and the sampling surface.

## FS-03b

**Table S7.** Location and dimensions of the FS-03b boulder, characteristics of the sampling surface, sample thickness, and topographic shielding factors derived from field data and with the ArcGIS toolbox of Li (2018).

|                                                       |                                                                                                               |                                                                    |
|-------------------------------------------------------|---------------------------------------------------------------------------------------------------------------|--------------------------------------------------------------------|
| <b>Coordinates (WGS 1984 coordinate system)</b>       | 47.869690 °N 8.037641 °E                                                                                      |                                                                    |
| <b>Elevation (m above sea-level)</b>                  | 1112                                                                                                          |                                                                    |
| <b>Context</b>                                        | Boulder on the distal side of the ice-marginal moraine at position FS-03 of the former Feldsee cirque glacier |                                                                    |
| <b>Lithology</b>                                      | Gneiss                                                                                                        |                                                                    |
| <b>Dimensions: length, width, and height (m)</b>      | 2.20 × 2.20 × 2.50                                                                                            |                                                                    |
| <b>Strike/dip of the sampled surface (°)</b>          | 100/35                                                                                                        |                                                                    |
| <b>Height above ground of the sampled surface (m)</b> | 1.90                                                                                                          |                                                                    |
| <b>Sample thickness (cm)</b>                          | 2.1                                                                                                           |                                                                    |
| <b>Topographic shielding factor</b>                   | <b>Field-data-based (Balco, 2018)</b>                                                                         | Not determined, as the boulder was located in a dense mixed forest |
|                                                       | <b>Digital-elevation-model-based (Li, 2018)</b>                                                               | 0.954505                                                           |

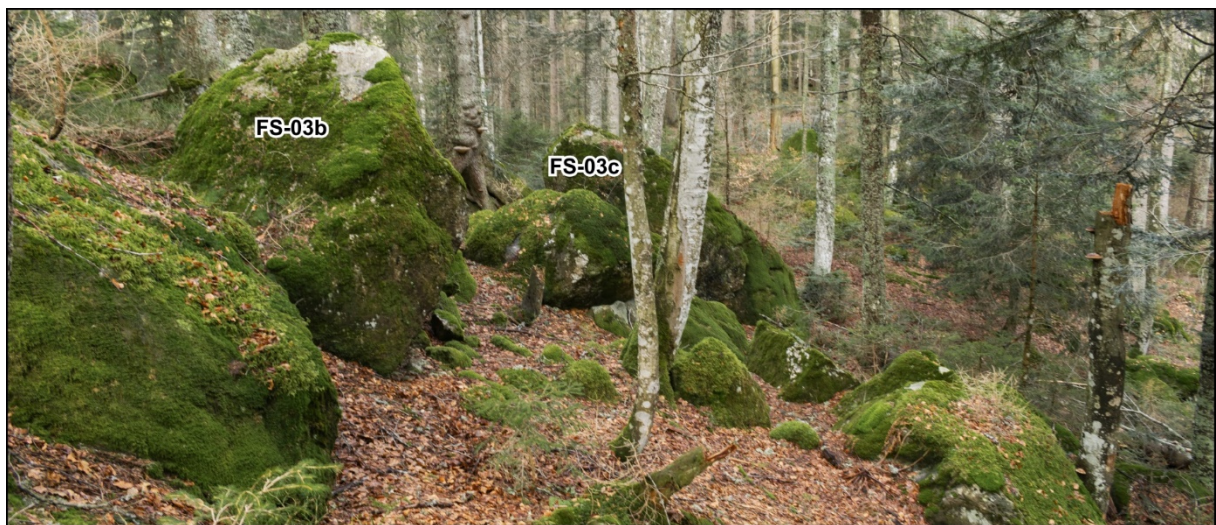

**Figure S7.** Photo of the FS-03b and FS-03c boulders.



### FS-03c

**Table S8.** Location and dimensions of the FS-03c boulder, characteristics of the sampling surface, sample thickness, and topographic shielding factors derived from field data and with the ArcGIS toolbox of Li (2018).

|                                                       |                                                                                                               |                                                                    |
|-------------------------------------------------------|---------------------------------------------------------------------------------------------------------------|--------------------------------------------------------------------|
| <b>Coordinates (WGS 1984 coordinate system)</b>       | 8.037687 °E 47.869732 °N                                                                                      |                                                                    |
| <b>Elevation (m above sea-level)</b>                  | 1110                                                                                                          |                                                                    |
| <b>Context</b>                                        | Boulder on the distal side of the ice-marginal moraine at position FS-03 of the former Feldsee cirque glacier |                                                                    |
| <b>Lithology</b>                                      | Gneiss                                                                                                        |                                                                    |
| <b>Dimensions: length, width, and height (m)</b>      | 4.50 × 2.70 × 3.90                                                                                            |                                                                    |
| <b>Strike/dip of the sampled surface (°)</b>          | 80/20                                                                                                         |                                                                    |
| <b>Height above ground of the sampled surface (m)</b> | 1.60                                                                                                          |                                                                    |
| <b>Sample thickness (cm)</b>                          | 1.9                                                                                                           |                                                                    |
| <b>Topographic shielding factor</b>                   | <b>Field-data-based (Balco, 2018)</b>                                                                         | Not determined, as the boulder was located in a dense mixed forest |
|                                                       | <b>Digital-elevation-model-based (Li, 2018)</b>                                                               | 0.985596                                                           |

## FS-03d

**Table S9.** Location and dimensions of the FS-03d boulder, characteristics of the sampling surface, sample thickness, and topographic shielding factors derived from field data and with the ArcGIS toolbox of Li (2018).

|                                                       |                                                 |                                                                                                                          |
|-------------------------------------------------------|-------------------------------------------------|--------------------------------------------------------------------------------------------------------------------------|
| <b>Coordinates (WGS 1984 coordinate system)</b>       |                                                 | 8.038474 °E 47.871280 °N                                                                                                 |
| <b>Elevation (m above sea-level)</b>                  |                                                 | 1099                                                                                                                     |
| <b>Context</b>                                        |                                                 | Boulder at the end of the distal side of the ice-marginal moraine at position FS-03 of the former Feldsee cirque glacier |
| <b>Lithology</b>                                      |                                                 | Gneiss                                                                                                                   |
| <b>Dimensions: length, width, and height (m)</b>      |                                                 | 2.70 × 2.20 × 0.90                                                                                                       |
| <b>Strike/dip of the sampled surface (°)</b>          |                                                 | 0/0                                                                                                                      |
| <b>Height above ground of the sampled surface (m)</b> |                                                 | 0.85                                                                                                                     |
| <b>Sample thickness (cm)</b>                          |                                                 | 2.0                                                                                                                      |
| <b>Topographic shielding factor</b>                   | <b>Field-data-based (Balco, 2018)</b>           | 0.985519                                                                                                                 |
|                                                       | <b>Digital-elevation-model-based (Li, 2018)</b> | 0.989967                                                                                                                 |

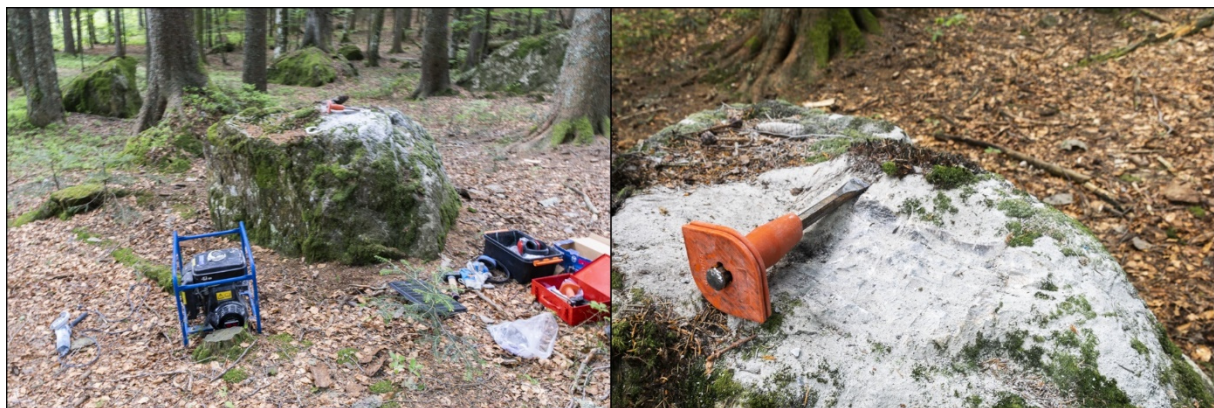

**Figure S8.** Photo of the FS-03d boulder and the sampling surface.

## FS-03e

**Table S10.** Location and dimensions of the FS-03e boulder, characteristics of the sampling surface, sample thickness, and topographic shielding factors derived from field data and with the ArcGIS toolbox of Li (2018).

|                                                       |                                                 |                                                                                                               |
|-------------------------------------------------------|-------------------------------------------------|---------------------------------------------------------------------------------------------------------------|
| <b>Coordinates (WGS 1984 coordinate system)</b>       |                                                 | 8.038263 °E 47.870467 °N                                                                                      |
| <b>Elevation (m above sea-level)</b>                  |                                                 | 1106                                                                                                          |
| <b>Context</b>                                        |                                                 | Boulder on the distal side of the ice-marginal moraine at position FS-03 of the former Feldsee cirque glacier |
| <b>Lithology</b>                                      |                                                 | Gneiss                                                                                                        |
| <b>Dimensions: length, width, and height (m)</b>      |                                                 | 2.30 × 2.00 × 2.00                                                                                            |
| <b>Strike/dip of the sampled surface (°)</b>          |                                                 | 320/35                                                                                                        |
| <b>Height above ground of the sampled surface (m)</b> |                                                 | 1.15                                                                                                          |
| <b>Sample thickness (cm)</b>                          |                                                 | 2.4                                                                                                           |
| <b>Topographic shielding factor</b>                   | <b>Field-data-based (Balco, 2018)</b>           | 0.958662                                                                                                      |
|                                                       | <b>Digital-elevation-model-based (Li, 2018)</b> | 0.960224                                                                                                      |

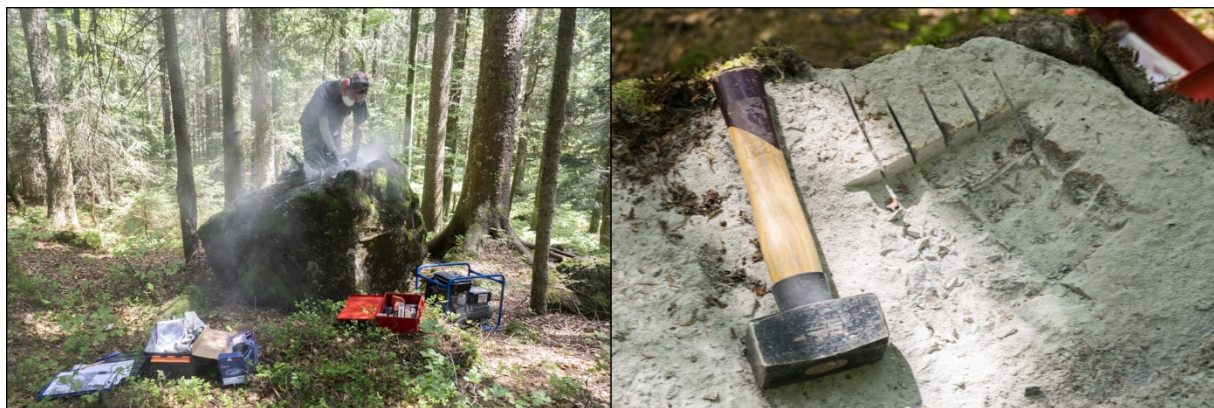

**Figure S9.** Photo of the FS-03e boulder and the sampling surface.

## FS-03f

**Table S11.** Location and dimensions of the FS-03f boulder, characteristics of the sampling surface, sample thickness, and topographic shielding factors derived from field data and with the ArcGIS toolbox of Li (2018).

|                                                       |                                                 |                                                                                                               |
|-------------------------------------------------------|-------------------------------------------------|---------------------------------------------------------------------------------------------------------------|
| <b>Coordinates (WGS 1984 coordinate system)</b>       |                                                 | 8.038298 °E 47.870475 °N                                                                                      |
| <b>Elevation (m above sea-level)</b>                  |                                                 | 1106                                                                                                          |
| <b>Context</b>                                        |                                                 | Boulder on the distal side of the ice-marginal moraine at position FS-03 of the former Feldsee cirque glacier |
| <b>Lithology</b>                                      |                                                 | Gneiss                                                                                                        |
| <b>Dimensions: length, width, and height (m)</b>      |                                                 | 3.20 × 2.30 × 2.20                                                                                            |
| <b>Strike/dip of the sampled surface (°)</b>          |                                                 | 160/20                                                                                                        |
| <b>Height above ground of the sampled surface (m)</b> |                                                 | 1.60                                                                                                          |
| <b>Sample thickness (cm)</b>                          |                                                 | 2.8                                                                                                           |
| <b>Topographic shielding factor</b>                   | <b>Field-data-based (Balco, 2018)</b>           | 0.982962                                                                                                      |
|                                                       | <b>Digital-elevation-model-based (Li, 2018)</b> | 0.985626                                                                                                      |

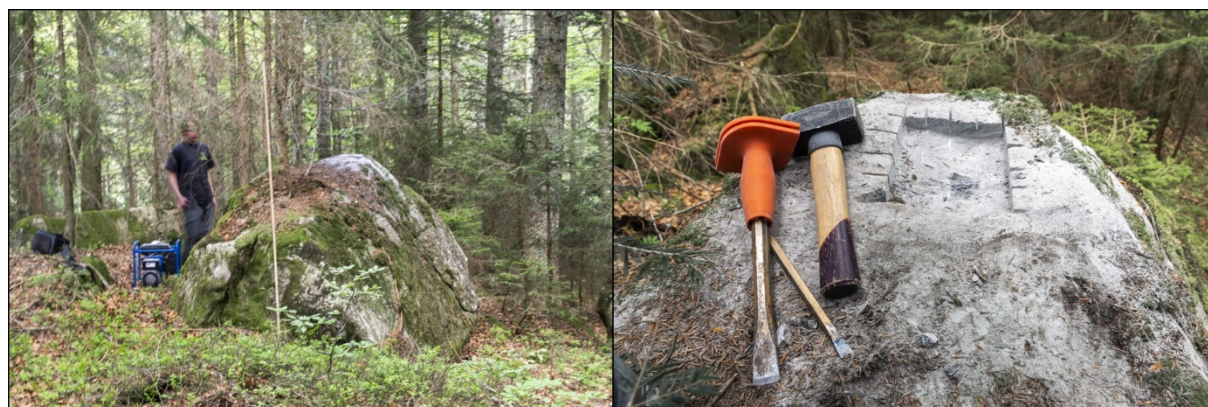

**Figure S10.** Photo of the FS-03f boulder and the sampling surface.



**Photos of radiocarbon dated macrofossils**

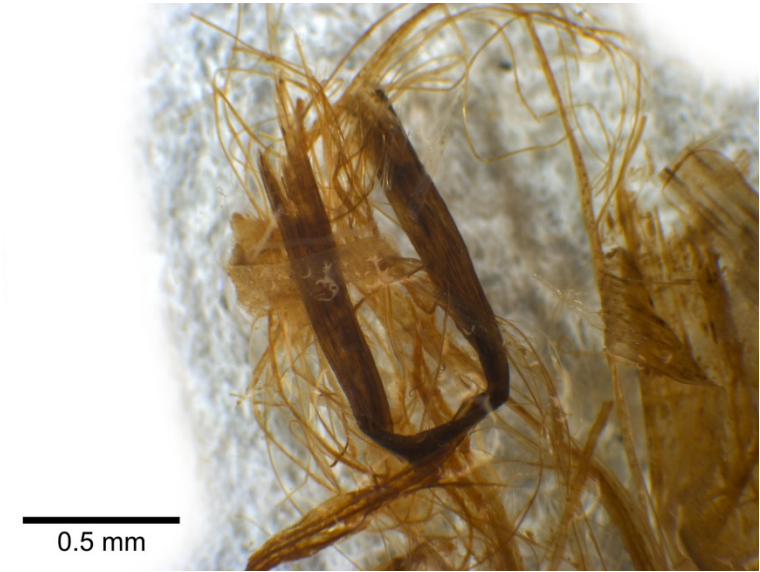

**Figure S11.** Photo of the FSM-536 sample.

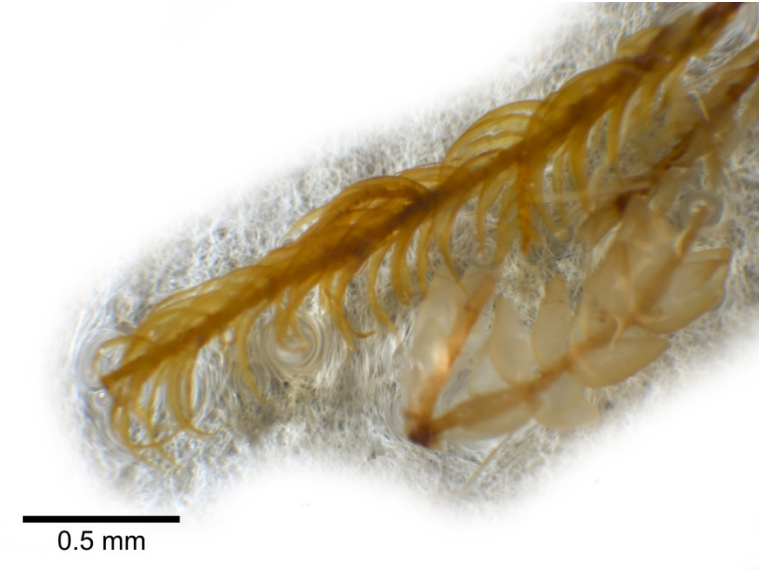

**Figure S12.** Photo of the FSM-538 sample.

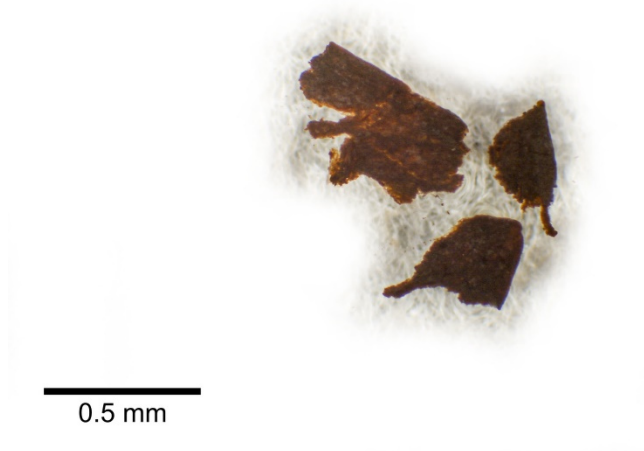

**Figure S13.** Photo of the FSM-550 sample.

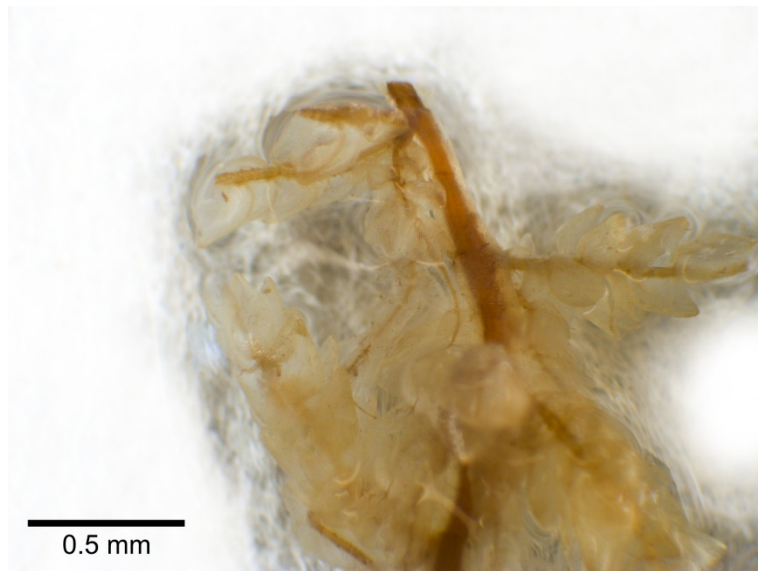

**Figure S14.** Photo of the FSM-553 sample.

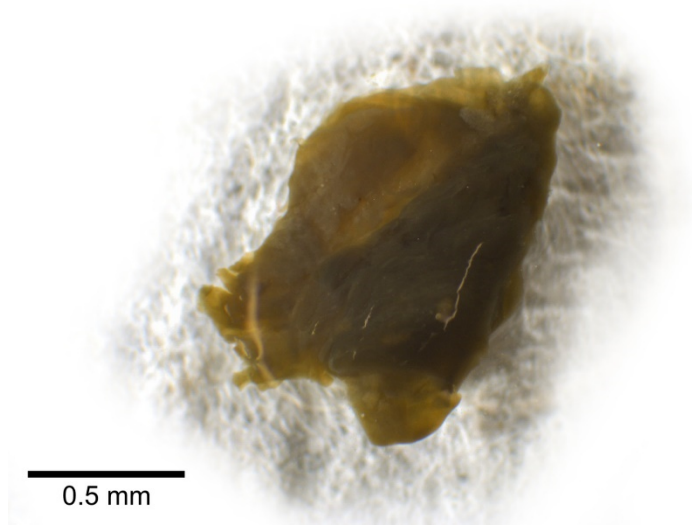

**Figure S15.** Photo of the FSM-558 sample.

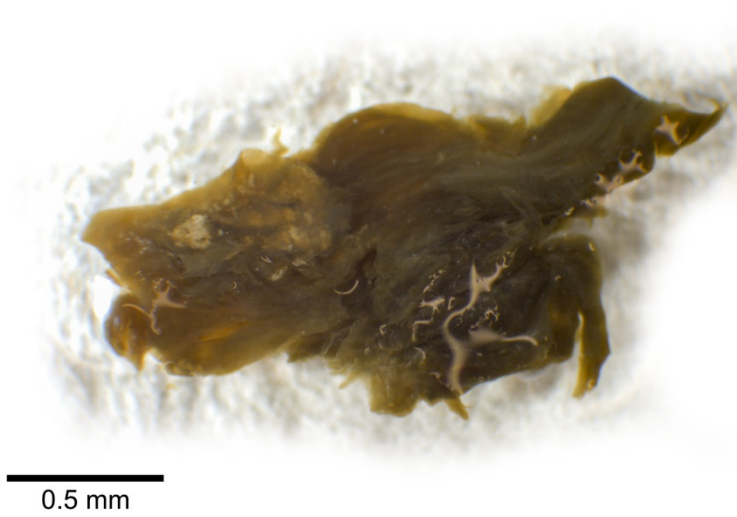

**Figure S16.** Photo of the FSM-560 sample.

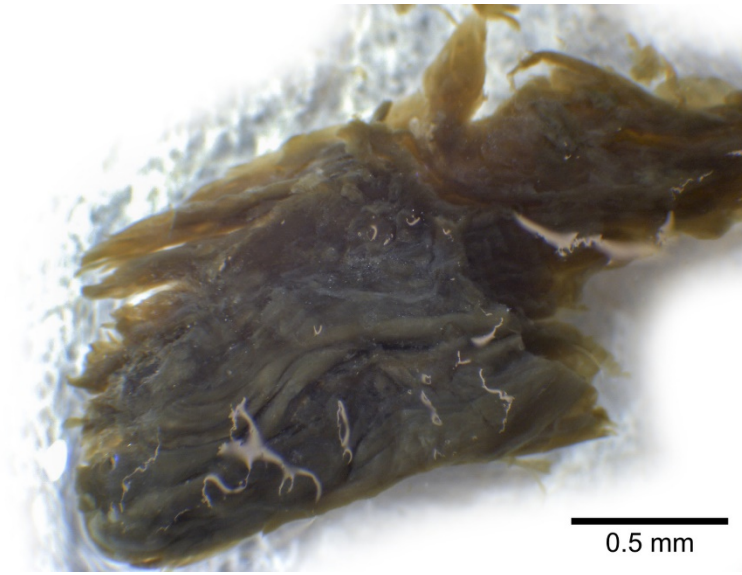

**Figure S17.** Photo of the FSM-563 sample.



## Input code for the *P\_Sequence*

```
Options()
{
  BCAD=FALSE;
};
Plot()
{
  P_Sequence("Feldseemoor",1,2,U(-2,2))
  {
    Boundary("Diamict/lake sediments boundary")
    {
      z=568;
    };
    R_Date("FSM-563", 12880, 60)
    {
      z=561;
    };
    R_Date("FSM-559", 12770, 60)
    {
      z=556;
    };
    Date("FSM5", N(calBP(14526),980))
    {
      z=555.5;
    };
    R_Date("FSM-558", 12930, 70)
    {
      z=554;
    };
    R_Date("FSM-550", 11540, 120)
    {
      z=543;
```

```

};
Date("Laacher See Tephra", N(calBP(13006),9))
{
  z=491;
};
Date("FSM1-FG", N(calBP(12127),1000))
{
  z=485.5;
};
R_Combine("FSM-450a / FSM-450b")
{
  R_Date("FSM-450a", 8620, 60);
  R_Date("FSM-450b", 8650, 50);
  z=428;
};
Boundary("Upper boundary of lake sediments")
{
  z=400;
};
};
};
};

```

## **Input-sheet for the online calculators formerly known as the CRONUS-Earth online calculators**

### **Name for calibration data set: Feldsee Cirque**

FS-02a 47.87216 8.03561 1113 std 2.4 2.65 0.947912 0 2020;

FS-02a Be-10 quartz 135802 5343 STD11;

FS-02a true\_t FSM 15640 420;

FS-02b 47.87143 8.03775 1103 std 2.6 2.65 0.987496 0 2020;

FS-02b Be-10 quartz 140611 5307 STD11;

FS-02b true\_t FSM 15640 420;

FS-02c 47.86993 8.03667 1108 std 2.0 2.65 0.987583 0 2020;

FS-02c Be-10 quartz 142114 4623 STD11;

FS-02c true\_t FSM 15640 420;

FS-03a 47.86961 8.03777 1108 std 2.1 2.65 0.989194 0 2020;

FS-03a Be-10 quartz 160738 13164 STD11;

FS-03a true\_t FSM 15640 420;

FS-03c 47.86973 8.03769 1110 std 1.9 2.65 0.985596 0 2020;

FS-03c Be-10 quartz 141544 4610 STD11;

FS-03c true\_t FSM 15640 420;

FS-03d 47.87128 8.03847 1099 std 2.0 2.65 0.989967 0 2020;

FS-03d Be-10 quartz 133327 4670 STD11;

FS-03d true\_t FSM 15640 420;

FS-03e 47.87047 8.03847 1106 std 2.4 2.65 0.960224 0 2020;

FS-03e Be-10 quartz 144143 5434 STD11;

FS-03e true\_t FSM 15640 420;

FS-03f 47.87047 8.03830 1106 std 2.8 2.65 0.985626 0 2020;

FS-03f Be-10 quartz 147407 5026 STD11;

FS-03f true\_t FSM 15640 420;

## References

- Balco, G.: Topographic shielding calculator, [http://stoneage.ice-d.org/math/skyline/skyline\\_in.html](http://stoneage.ice-d.org/math/skyline/skyline_in.html), last access: 17 October 2023, 2018.
- Li, Y.-K.: Determining topographic shielding from digital elevation models for cosmogenic nuclide analysis: a GIS model for discrete sample sites, *J. Mt. Sci.*, 15, 939–947, <https://doi.org/10.1007/s11629-018-4895-4>, 2018.
